# Supplementary material for: Humoral Immune Response to CoronaVac in Turkish Adults
Source: MDPI journal article supplement (doi:10.3390/vaccines11020216), 2023-01-18
Supplement: s1 [file s1]

**Table S1. Antibody reactivity after vaccination with ChAdOx1 nCoV-19.** Median titers and positivity rates of SARS-CoV-2-specific antibodies in 10 Bangladeshi adults (5 males, 5 females; age 38.4±11.7 years, range: 23-60 years, median: 37.5 years; without previous SARS-CoV-2 infection) before and after administration of two doses of ChAdOx1 nCoV-19 vaccine.

| Sampling time                        | Anti-S1 IgG                    |                         |            | Anti-S1 IgA            |                         |            |
|--------------------------------------|--------------------------------|-------------------------|------------|------------------------|-------------------------|------------|
|                                      | Median [range]                 | Rate (n/N) <sup>a</sup> | 95% CI     | Median [range]         | Rate (n/N) <sup>a</sup> | 95% CI     |
| t0<br>(baseline pre-vaccination)     | <3.2 BAU/ml<br>[<3.2-7.3]      | 0% (0/10)               | 0-32.1%    | Ratio 0.2<br>[0.1-0.9] | 0% (0/10)               | 0-32.1%    |
| t1<br>(19-21 days after first dose)  | 143.7 BAU/ml<br>[24.0-565.6]   | 90.0% (9/10)            | 57.4-99.9% | Ratio 2.0<br>[0.6-9.0] | 90.0% (9/10)            | 57.4-99.9% |
| t2<br>(19-20 days after second dose) | 807.2 BAU/ml<br>[431.0-1523.4] | 100% (10/10)            | 67.9-100%  | Ratio 1.7<br>[0.7-7.0] | 90.0% (9/10)            | 57.4-99.9% |

Abbreviations: BAU/ml, binding antibody units per milliliter; CI, confidence interval; ELISA, enzyme-linked immunosorbent assay; SARS-CoV-2, severe acute respiratory syndrome-associated coronavirus 2; S1, spike protein subunit S1

<sup>a</sup>Borderline results were considered positive.
